# Supplementary material
Source: publisher site journal article supplement (https://spandidos-publications.com/241/downloadSupplementary)

**A**

[Ungated] FS INT / SS INT

[A] CD3-FITC / SS INT

[R] CD4-PE / SS INT

[S] CD279-PC7 / SS INT

[R] CD8-PC5.5 / SS INT

[H] CD279-PC7 / SS INT

[H] CD8-PC5.5 / SS INT

[P] CD274-PC7 / SS INT

**B**

[Ungated] FS INT / SS INT

[A] CD3-FITC / SS INT

[H] CD4-PE / SS INT

[K] CD274-PC7 / SS INT

[H] CD8-PC5.5 / SS INT

[P] CD274-PC7 / SS INT

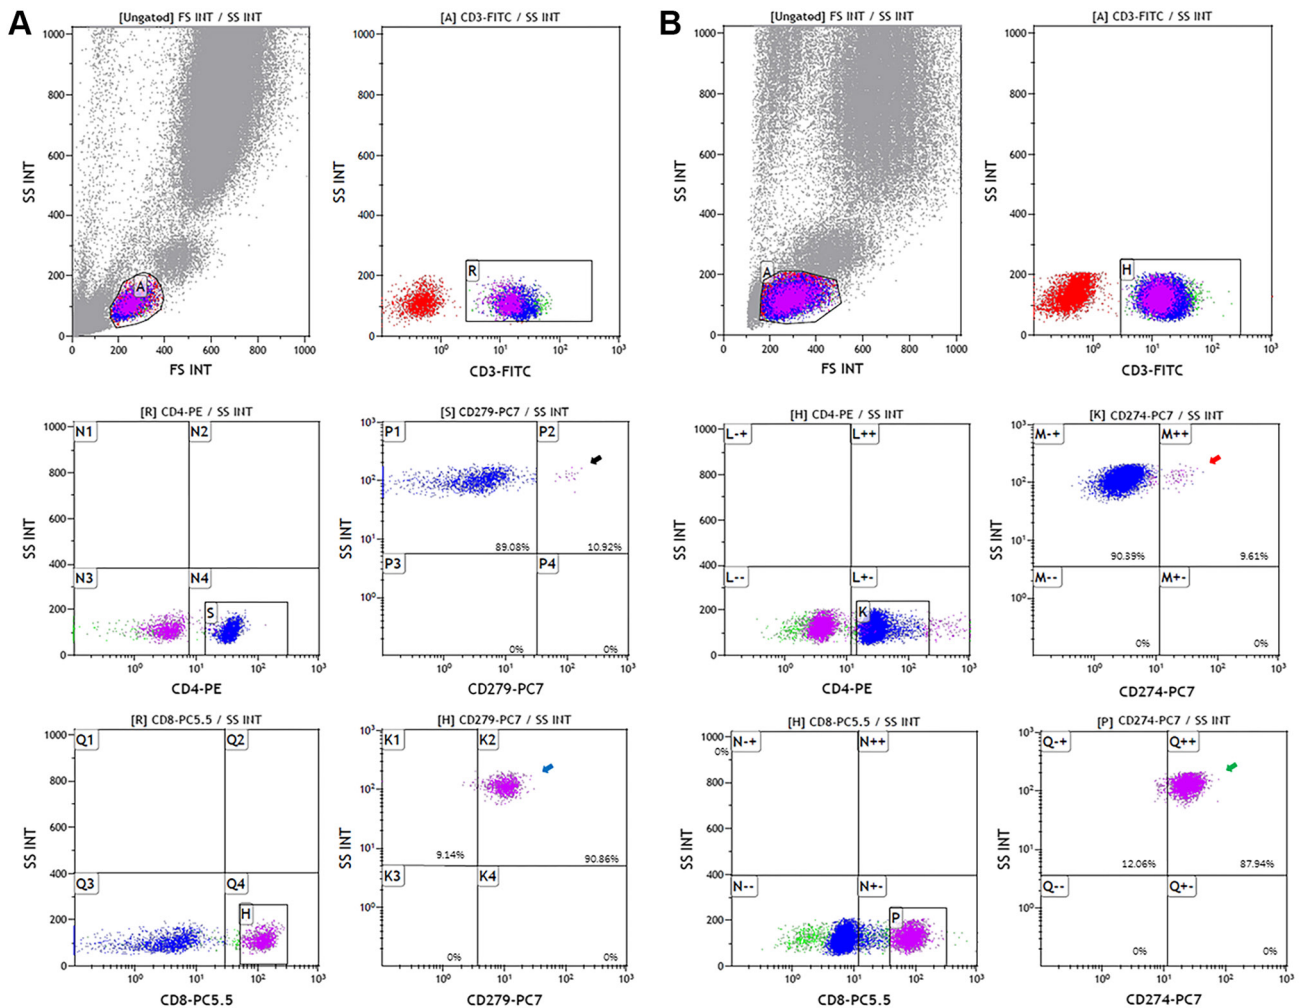

Supplement: Supplementary file 1 [file downloadSupplementary]
